# Supplementary material for: A Viral mRNA Motif at the 3′-Untranslated Region that Confers Translatability in a Cell-Specific Manner. Implications for Virus Evolution
Source: PubMed Central journal article supplement (PMC4709744; doi:10.1038/srep19217), 2016-01-12
Supplement: srep19217-s1.pdf [file srep19217-s1.pdf]

## **SUPPLEMENTARY INFORMATION**

A Viral mRNA Motif at the 3'-Untranslated Region that Confers Translatability  
in a Cell-Specific Manner. Implications for Virus Evolution.

Manuel Garcia-Moreno, Miguel Angel Sanz and Luis Carrasco

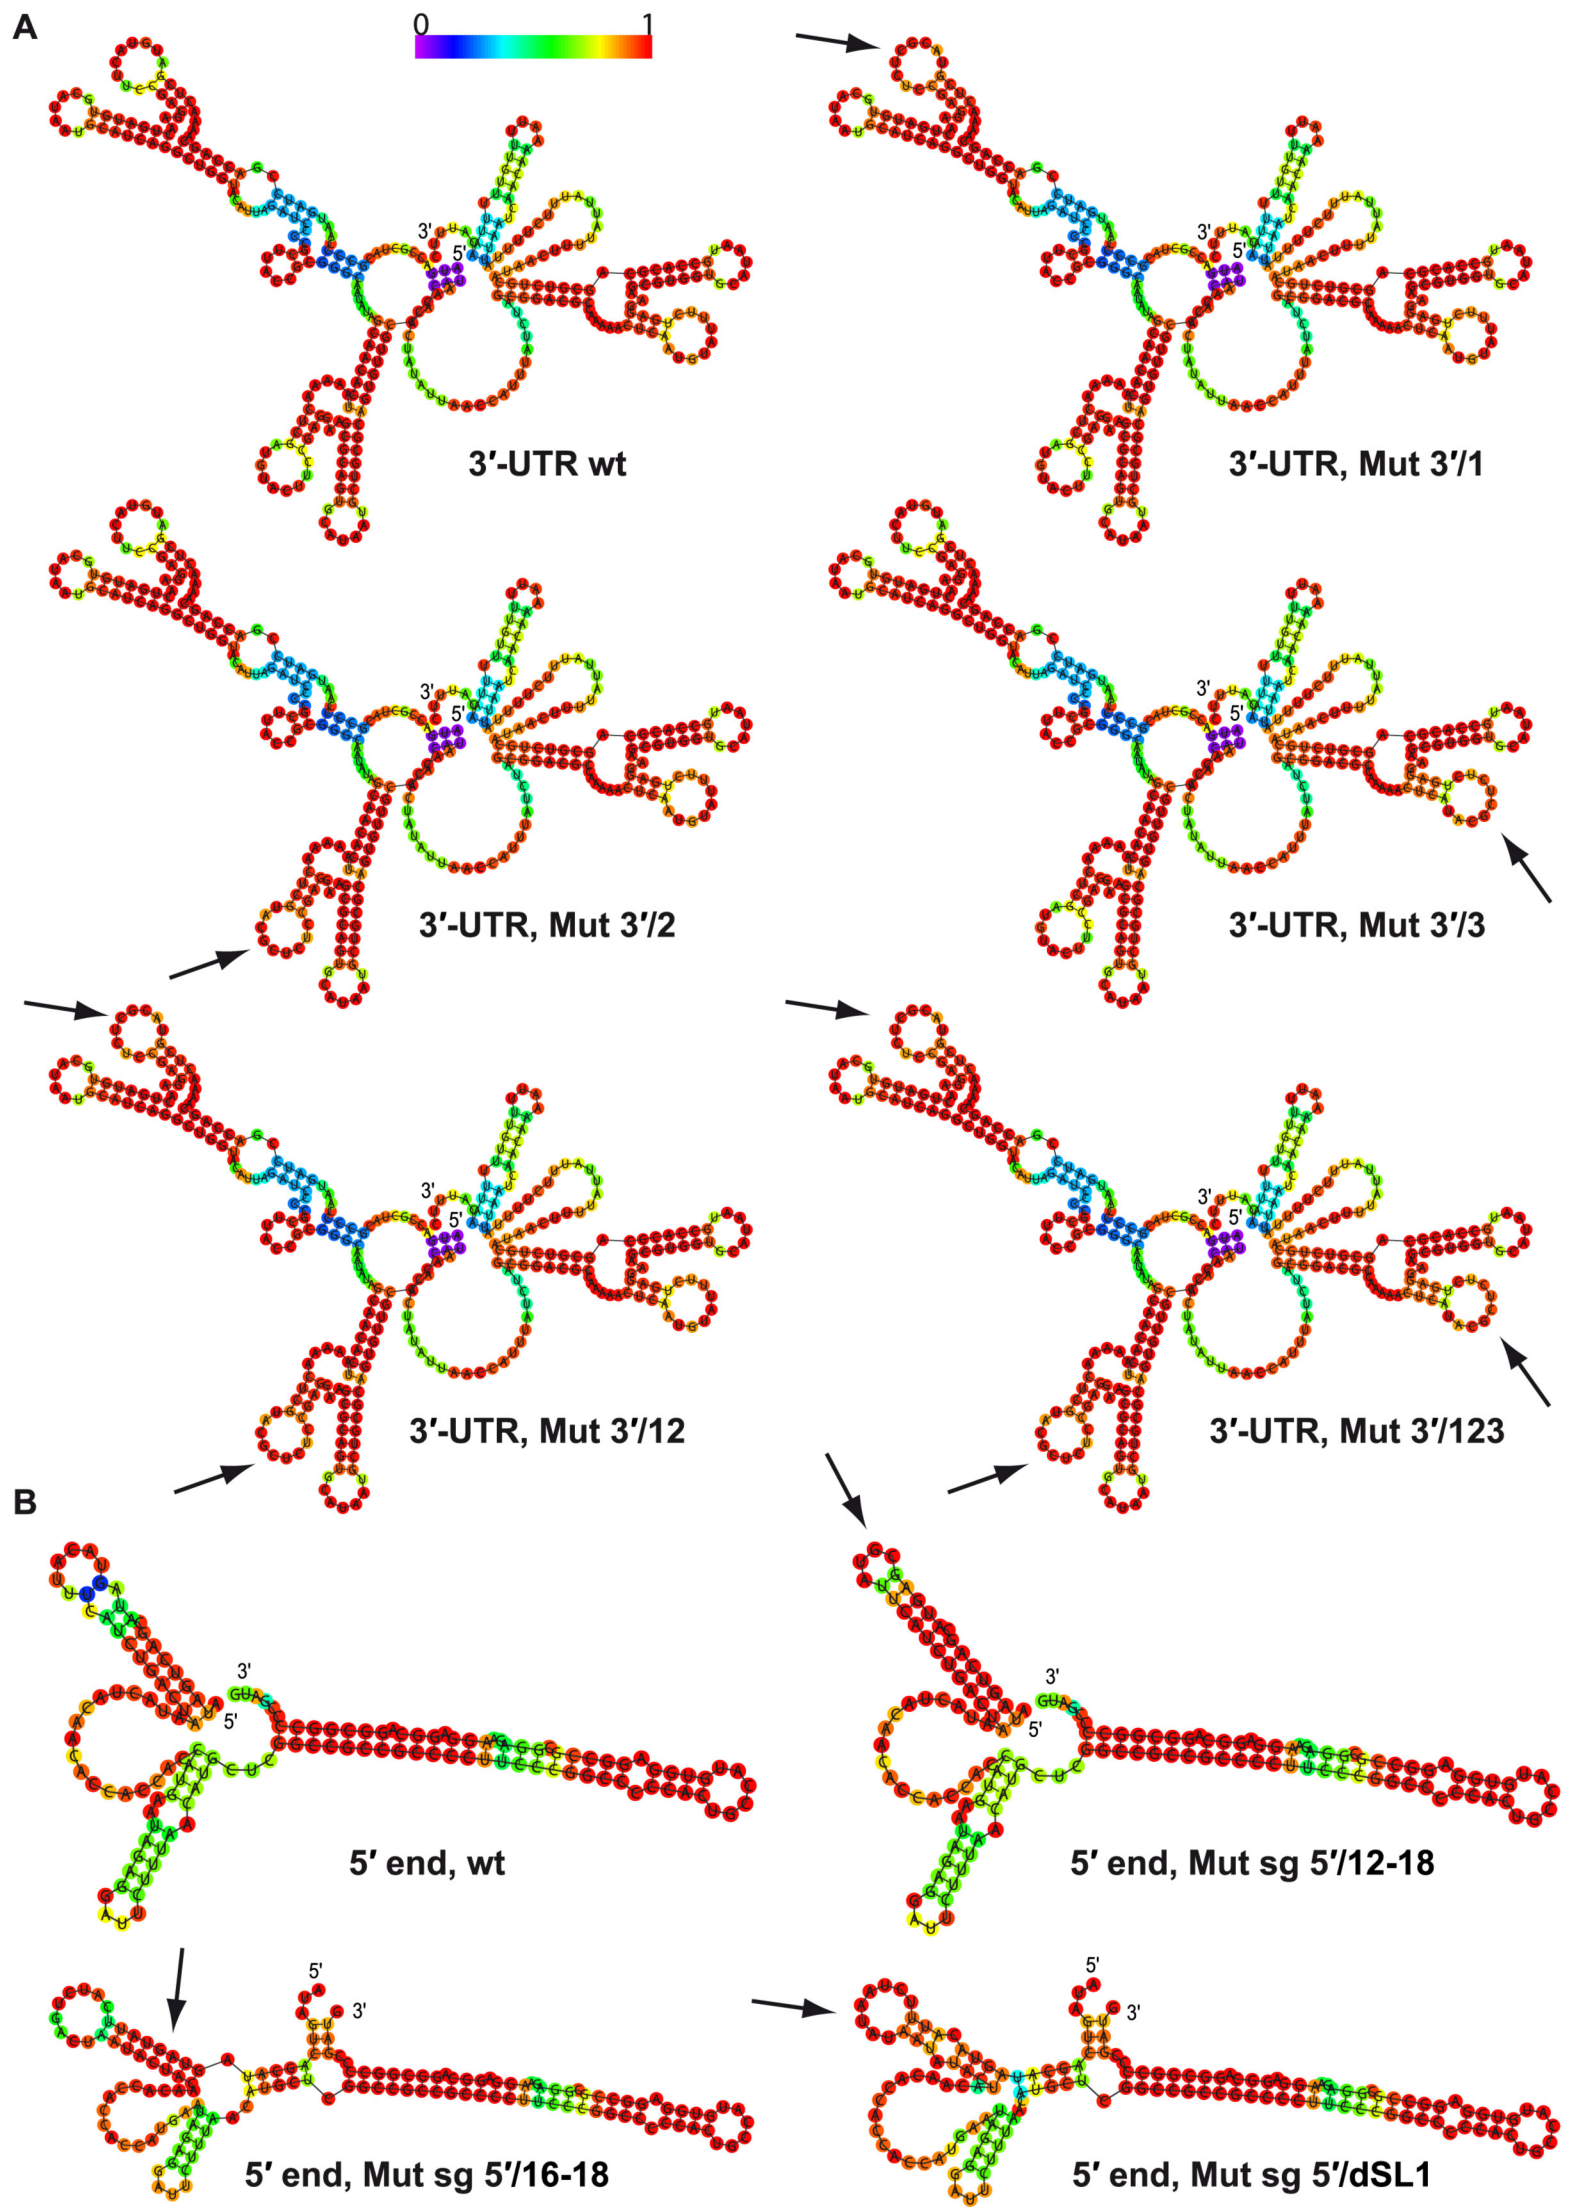

**Supplementary Figure S1. Base-pairing probabilities of the 3' and 5' ends of different SINV RNAs.** The minimum free energy secondary structure of the SINV 3'-UTRs (*A*) and sgmRNA 5' ends (*B*) generated in this work were predicted using the RNAfold WebServer. Colors denote base-pairing probabilities or, in the case of unpaired bases, the probability of being unpaired. Arrows indicate the location of the different mutations (see more details in Fig. 1).

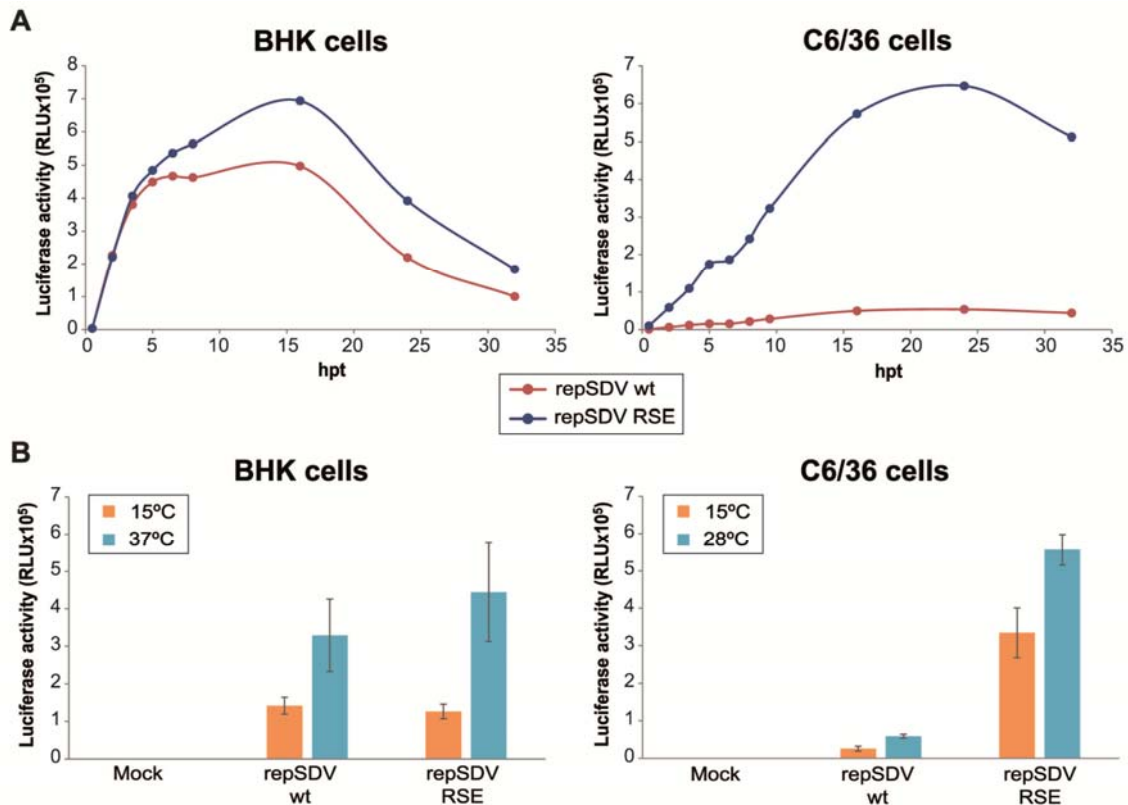

**Supplementary Figure S2. Production of luciferase from SDV replicons at different times and temperatures.** (A) BHK (*left panel*) and C6/36 (*right panel*) cells were transfected with repSDV wt or repSDV RSE using Lipofectamine 2000. At different times post-transfection, cells were harvested and lysed to measure *Renilla* luciferase activity. (B) The SDV replicons were transfected into BHK (*left panel*) or C6/36 (*right panel*) cells using Lipofectamine 2000 and incubated at the indicated temperatures for 24 h. Next, *Renilla* luciferase activity was determined. Values are represented as means  $\pm$  SD of two representative experiments.

**Supplementary Table S1.** Nomenclature of plasmids, replicons, sgRNAs and gmRNAs, with their respective abbreviated names.

| Plasmid                       | replicon/gmRNA         | sgmRNA           | Abbreviated name | Product obtained by <i>in vitro</i> transcription                                                                                                                                                               |
|-------------------------------|------------------------|------------------|------------------|-----------------------------------------------------------------------------------------------------------------------------------------------------------------------------------------------------------------|
| pT7 rep C+luc                 | rep C+luc              | C+luc            | rep wt           | SINV replicon bearing the C gene followed by the luc gene.                                                                                                                                                      |
| pT7 rep C+luc sg5'/12-18      | rep C+luc sg5'/12-18   | C+luc sg5'/12-18 | rep 5'/12-18     | SINV replicon bearing the C gene followed by the luc gene. The nucleotides 12 to 18 of the sg 5'-UTR are mutated.                                                                                               |
| pT7 rep C+luc sg5'/16-18      | rep C+luc sg5'/16-18   | C+luc sg5'/16-18 | rep 5'/16-18     | SINV replicon bearing the C gene followed by the luc gene. The nucleotides 16 to 18 of the sg 5'-UTR are mutated.                                                                                               |
| pT7 rep C+luc sg5'/dSL1       | rep C+luc sg5'/dSL1    | C+luc sg5'/dSL1  | rep 5'/dSL1      | SINV replicon bearing the C gene followed by the luc gene. The SL1 structure of the sg 5'-UTR is disrupted.                                                                                                     |
| pT7 rep C+luc 3'/1            | rep C+luc 3'/1         | C+luc 3'/1       | rep 3'/1         | SINV replicon bearing the C gene followed by the luc gene. Seq 1 of the 3'-UTR is mutated.                                                                                                                      |
| pT7 rep C+luc 3'/2            | rep C+luc 3'/2         | C+luc 3'/2       | rep 3'/2         | SINV replicon bearing the C gene followed by the luc gene. Seq 2 of the 3'-UTR is mutated.                                                                                                                      |
| pT7 rep C+luc 3'/3            | rep C+luc 3'/3         | C+luc 3'/3       | rep 3'/3         | SINV replicon bearing the C gene followed by the luc gene. Seq 3 of the 3'-UTR is mutated.                                                                                                                      |
| pT7 rep C+luc 3'/1+2          | rep C+luc 3'/1+2       | C+luc 3'/1+2     | rep 3'/12        | SINV replicon bearing the C gene followed by the luc gene. Seq 1 and Seq 2 of the 3'-UTR are mutated.                                                                                                           |
| pT7 rep C+luc 3'/1+2+3        | rep C+luc 3'/1+2+3     | C+luc 3'/1+2+3   | rep 3'/123       | SINV replicon bearing the C gene followed by the luc gene. Seq 1, Seq 2 and Seq 3 of the 3'-UTR are mutated.                                                                                                    |
| pToto1101/Luc ΔnsP4           | SV-luc ΔnsP4 wt        |                  | G wt             | Recombinant SINV containing the luc gene placed inside the nsP3 sequence. nsP4 is cleaved at the HpaI restriction site. This mRNA is unable to replicate.                                                       |
| pToto1101/Luc ΔnsP4 g5'/12-18 | SV-luc ΔnsP4 g5'/12-18 |                  | G 5'/12-18       | Recombinant SINV containing the luc gene placed inside the nsP3 sequence. nsP4 is cleaved at the HpaI restriction site. This mRNA is unable to replicate. The nucleotides 12 to 18 of the g 5'-UTR are mutated. |

| Plasmid                                  | replicon/gmRNA                    | sgmRNA                      | Abbreviated name | Product obtained by <i>in vitro</i> transcription                                                                                                                                                                                                        |
|------------------------------------------|-----------------------------------|-----------------------------|------------------|----------------------------------------------------------------------------------------------------------------------------------------------------------------------------------------------------------------------------------------------------------|
| pToto1101/Luc ΔnsP4 3'/1+2               | SV-luc ΔnsP4 3'/1+2               |                             | G 3'/12          | Recombinant SINV containing the luc gene placed inside the nsP3 sequence. nsP4 is cleaved at the HpaI restriction site. This mRNA is unable to replicate. Seq 1 and Seq 2 of the 3'-UTR are mutated.                                                     |
| pToto1101/Luc ΔnsP4 3'/1+2+3             | SV-luc ΔnsP4 3'/1+2+3             |                             | G 3'/123         | Recombinant SINV containing the luc gene placed inside the nsP3 sequence. nsP4 is cleaved at the HpaI restriction site. This mRNA is unable to replicate. Seq 1, Seq 2 and Seq 3 of the 3'-UTR are mutated.                                              |
| pToto1101/Luc ΔnsP4 g5'/12-18 + 3'/1+2+3 | SV-luc ΔnsP4 g5'/12-18 + 3'/1+2+3 |                             | G 5'+3'          | Recombinant SINV containing the luc gene placed inside the nsP3 sequence. nsP4 is cleaved at the HpaI restriction site. This mRNA is unable to replicate. The nucleotides 12 to 18 of the g 5'-UTR and Seq 1, Seq 2 and Seq 3 of the 3'-UTR are mutated. |
| pT7 C+luc                                |                                   | C+luc wt                    | SG wt            | SINV sgmRNA bearing the C gene followed by the luc gene. This mRNA is unable to replicate.                                                                                                                                                               |
| pT7 C+luc sg5'/12-18                     |                                   | C+luc sg5'/12-18            | SG 5'/12-18      | SINV sgmRNA bearing the C gene followed by the luc gene. This mRNA is unable to replicate. The nucleotides 12 to 18 of the sg 5'-UTR are mutated.                                                                                                        |
| pT7 C+luc 3'/1                           |                                   | C+luc 3'/1                  | SG 3'/1          | SINV sgmRNA bearing the C gene followed by the luc gene. This mRNA is unable to replicate. Seq 1 of the 3'-UTR is mutated.                                                                                                                               |
| pT7 C+luc 3'/2                           |                                   | C+luc 3'/2                  | SG 3'/2          | SINV sgmRNA bearing the C gene followed by the luc gene. This mRNA is unable to replicate. Seq 2 of the 3'-UTR is mutated.                                                                                                                               |
| pT7 C+luc 3'/3                           |                                   | C+luc 3'/3                  | SG 3'/3          | SINV sgmRNA bearing the C gene followed by the luc gene. This mRNA is unable to replicate. Seq 3 of the 3'-UTR is mutated.                                                                                                                               |
| pT7 C+luc 3'/1+2                         |                                   | C+luc 3'/1+2                | SG 3'/12         | SINV sgmRNA bearing the C gene followed by the luc gene. This mRNA is unable to replicate. Seq 1 and Seq 2 of the 3'-UTR are mutated.                                                                                                                    |
| pT7 C+luc 3'/1+2+3                       |                                   | C+luc 3'/1+2+3              | SG 3'/123        | SINV sgmRNA bearing the C gene followed by the luc gene. This mRNA is unable to replicate. Seq 1, Seq 2 and Seq 3 of the 3'-UTR are mutated.                                                                                                             |
| pT7 C+luc sg5'/12-18 + 3'/1+2+3          |                                   | C+luc sg5'/12-18 + 3'/1+2+3 | SG 5'+3'         | SINV sgmRNA bearing the C gene followed by the luc gene. This mRNA is unable to replicate. The nucleotides 12 to 18 of the sg 5'-UTR and Seq 1, Seq 2 and Seq 3 of the 3'-UTR are mutated.                                                               |

| Plasmid                                                                                                                                                                                                                                                                                                                                                                                                                                                             | replicon/gmRNA           | sgmRNA               | Abbreviated name | Product obtained by <i>in vitro</i> transcription                                                                                                                                                        |
|---------------------------------------------------------------------------------------------------------------------------------------------------------------------------------------------------------------------------------------------------------------------------------------------------------------------------------------------------------------------------------------------------------------------------------------------------------------------|--------------------------|----------------------|------------------|----------------------------------------------------------------------------------------------------------------------------------------------------------------------------------------------------------|
| pT7 Lluc-luc                                                                                                                                                                                                                                                                                                                                                                                                                                                        |                          | Lluc-luc wt          | luc wt           | mRNA encoding the luc gene under the control of the luc leader sequence. Contains SINV 3'-UTR.                                                                                                           |
| pT7 Lluc-luc 3'/1+2+3                                                                                                                                                                                                                                                                                                                                                                                                                                               |                          | Lluc-luc 3'/1+2+3    | luc 3'/123       | mRNA encoding the luc gene under the control of the luc leader sequence. Contains SINV 3'-UTR with mutated Seq 1, Seq 2 and Seq 3.                                                                       |
| pnsP-LUC                                                                                                                                                                                                                                                                                                                                                                                                                                                            | rep SDV-LUC wt           | SDV-LUC wt           | repSDV wt        | SDV replicon bearing the LUC gene in place of the structural coding region.                                                                                                                              |
| pnsP-LUC 3'/RSE                                                                                                                                                                                                                                                                                                                                                                                                                                                     | rep SDV-LUC 3'/RSE       | SDV-LUC 3'/RSE       | repSDV RSE       | SDV replicon bearing the LUC gene in place of the structural coding region. Contains the RSE of SINV at the beginning of the 3'-UTR.                                                                     |
| pnsP-LUC 3'/RSE 1+2+3                                                                                                                                                                                                                                                                                                                                                                                                                                               | rep SDV-LUC 3'/RSE 1+2+3 | SDV-LUC 3'/RSE 1+2+3 | repSDV RSE123    | SDV replicon bearing the LUC gene in place of the structural coding region. Contains the RSE of SINV with mutated Seq 1, Seq 2 and Seq 3 at the beginning of the 3'-UTR.                                 |
| pT7 SDV-LUC                                                                                                                                                                                                                                                                                                                                                                                                                                                         |                          | SDV-LUC wt           | sgSDV wt         | SDV sgmRNA bearing the LUC gene in place of the structural coding region. This mRNA is unable to replicate.                                                                                              |
| pT7 SDV-LUC 3'/RSE                                                                                                                                                                                                                                                                                                                                                                                                                                                  |                          | SDV-LUC 3'/RSE       | sgSDV RSE        | SDV sgmRNA bearing the LUC gene in place of the structural coding region. This mRNA is unable to replicate. Contains the RSE of SINV at the beginning of the 3'-UTR.                                     |
| pT7 SDV-LUC 3'/RSE 1+2+3                                                                                                                                                                                                                                                                                                                                                                                                                                            |                          | SDV-LUC 3'/RSE 1+2+3 | sgSDV RSE123     | SDV sgmRNA bearing the LUC gene in place of the structural coding region. This mRNA is unable to replicate. Contains the RSE of SINV with mutated Seq 1, Seq 2 and Seq 3 at the beginning of the 3'-UTR. |
| <b>Abbreviations:</b> <i>gmRNA</i> , genomic mRNA; <i>sgmRNA</i> , subgenomic mRNA; <i>SINV</i> , Sindbis virus; <i>C</i> , capsid protein; <i>luc</i> , firefly luciferase; <i>sg</i> , subgenomic; <i>UTR</i> , untranslated region; <i>SL</i> , stem-loop; <i>Seq</i> , sequence; <i>nsP</i> , non-structural protein; <i>g</i> , genomic; <i>SDV</i> , Sleeping disease virus; <i>LUC</i> , <i>Renilla</i> luciferase; <i>RSE</i> , repeated sequence elements. |                          |                      |                  |                                                                                                                                                                                                          |

**Supplementary Table S2.** List of plasmids, template plasmids and primers.

| Plasmid                     | Template plasmid        | Primers           | 5'-3' Sequence                                                                            |
|-----------------------------|-------------------------|-------------------|-------------------------------------------------------------------------------------------|
| pT7 rep C+luc<br>sg5'/12-18 | pT7 rep C+luc           | 5' 7nts           | ATAGTCAGCATGAGCGTATTCATCTGACTAATAC                                                        |
|                             |                         | 3' 7nts           | GTATTAGTCAGATGAATACGCTCATGCTGACTAT                                                        |
| pT7 rep C+luc<br>sg5'/16-18 | pT7 rep C+luc           | 5' 3nts           | ATAGTCAGCATAGTAGTATTCATCTGACTAATAC                                                        |
|                             |                         | 3' 3nts           | GTATTAGTCAGATGAATACTACTATGCTGACTAT                                                        |
| pT7 rep C+luc<br>sg5'/dSL1  | pT7 rep C+luc           | 5' dSL1           | CAGCATAGTACATTTCTAATATAATACTACAACACC                                                      |
|                             |                         | 3' dSL1           | GGTGTTGTAGTATATTATATTAGAAATGTACTATGCTG                                                    |
| pT7 rep C+luc 3'/1          | pT7 rep C+luc           | 5' Mut1           | GATCCGACCAGCAAACTCGTACGCTCTCCGAGGAAC<br>TGATGTGCATAATGCATCAGGCTGGTACATTAG                 |
|                             |                         | 3' Mut1           | GATCTAATGTACCAGCCTGATGCATTATGCACATCAGT<br>TCCTCGGAGAGCGTACGAGTTTTGCTGGTCGGATCAT<br>TGGGGC |
| pT7 rep C+luc 3'/2          | pT7 rep C+luc           | 5' Mut2           | GCAATATAGCAACACTAAAACTCGTACGCTCTCCGAG<br>GAAGCGCAGTGCATAATGCTGCGCAGTGTGCCACAT<br>AACCAC   |
|                             |                         | 3' Mut2           | CAACACTGCGCAGCATTATGCACTGCGCTTCCTCGGA<br>GAGCGTACGAGTTTTTAGTGTTGCTATATTGCCCG              |
| pT7 rep C+luc 3'/3          | pT7 rep C+luc           | 5' Mut3           | CATTTATCTAGCGGACGCCAAAACTCATAACGCTCTCT<br>GAGGAAGCGTGGTGCATAATGCCACGCAGCGTCTGCA<br>TAAC   |
|                             |                         | 3' Mut3           | GTTATGCAGACGCTGCGTGGCATTATGCACCACGCTT<br>CCTCAGAGAGCGTATGAGTTTTTGCGTCCGCTAGAT<br>AAATG    |
| pT7 rep C+luc 3'/1+2        | pT7 rep C+luc 3'/1      | 5' Mut2           |                                                                                           |
|                             |                         | 3' Mut2           |                                                                                           |
| pT7 rep C+luc<br>3'/1+2+3   | pT7 rep C+luc<br>3'/1+2 | 5' Mut3           |                                                                                           |
|                             |                         | 3' Mut3           |                                                                                           |
|                             |                         | 5'SacI-<br>T7prom | GCGCGCGAGCTCTAATACGACTCACTATAGATAGTCA<br>GCATAGT                                          |
|                             |                         | 3'Aat             | CGTTCCTTGACGTCTGAAC                                                                       |
|                             |                         | 5'gen7            | GACGGCGTGAGCGTAACTATTGAATC                                                                |
|                             |                         | 3'AfeI-<br>gen7   | CATGGGAAAAGCGCTAAAAGAGGCTGGG                                                              |
|                             |                         | 5'SacI-<br>gen7   | CGGAGCCTATGGAAAAACGCCAGC                                                                  |
|                             |                         | 3'gen7            | CAATAGTTACGCTCACGCCGTCAATC                                                                |
|                             |                         | 3'Luc SphI        | CCCGGGGCATGCGAGAATCTGACGCAG                                                               |
|                             |                         | 5'EcoRV-<br>RSE   | TGAACAATAAGATATCCGCTACGCCCAATGATCCGAC<br>C                                                |



| <b>Primers</b> | <b>5'-3' Sequence</b>                                              |
|----------------|--------------------------------------------------------------------|
| 3'RSE-SDV      | GATGGGCTCCTAGTGAGCGATTTGTATACCGGAATGT<br>TATGCAGACGCTGCGTGGCATTATG |
| 5'SDV          | ATTCCGGTATACAAATCGCTCACTAGGAGCCCATC                                |
| 3'SDV          | GGCTGATCAGCGAGCTCTAGC                                              |
| 5'EcoRI-T7-SDV | GAGGGCGAATTCTAATACGACTCACTATAGTAACCTTA<br>ATATTTTCTGC              |
| Left SubG4     | ATCCCTCGCGGAGTAGGA                                                 |
| Right SubG4    | ACCGGAGTTATCCATGATCG                                               |
| Left luc2      | AGGTCTTCCCGACGATGA                                                 |
| Right luc2     | GTCTTTCCGTGCTCCAAAAC                                               |
| Left RLUC1     | GGAGAATAACTTCTTCGTGGAAAC                                           |
| Right RLUC1    | GCTGCAAATTCTTCTGGTTCTAA                                            |
| Left La1       | CGTGACGTGAAAGGATTTGC                                               |
| Right La1      | AACTCGAGCAGTTCGCTCAT                                               |
| Left RPS2      | AACGACAAGCAGGGTTTCC                                                |
| Right RPS2     | CGTGGGCGATAGCAAGAG                                                 |
| Left Act2      | CTCTCCCTCATGCCATCCT                                                |
| Right Act2     | GTAGCCACGCTCGGTCAG                                                 |
| Left LPAR2     | CCTTCCGATCTCGTACCATT                                               |
| Right LPAR2    | GGATCCAGACTCCAGCACAT                                               |
